# Supplementary material for: Microbial diversity and abundance in loamy sandy soil under renaturalization of former arable land
Source: PeerJ. 2023 Mar 6;11:e14761. doi: 10.7717/peerj.14761 (PMC9997190; doi:10.7717/peerj.14761)
Supplement: Supplemental Information 1 [file peerj-11-14761-s001.xlsx]

## Sheet: Meteo-conditions
Year	Month	Temperature	Multi-annual	Precipitation	Multi-annual
		average		average
2017	March	3.4	0.7	61	41
	April	5.4	7.4	69	43
	May	12.7	12.9	8	56
	June	15.4	16.3	127	65
	July	16.7	18.5	120	92
	August	17.4	17.6	130	76
	September	13.3	12.6	76	57
	October	6.7	6.8	125	60
2018	Kovas	-2.1	0.7	20.8	41
	Balandis	10.3	7.4	41	43
	Gegužė	17.1	12.9	17.2	56
	Birželis	17.3	16.3	39	65
	Liepa	19.5	18.5	119.3	92
	Rugpjūtis	19.2	17.6	53.9	76
	Rugsėjis	14.7	12.6	33.7	57
	Spalis	8.1	6.8	41.2	60
2019	Kovas	3.1	0.7	49.4	41
	Balandis	9	7.4	0.6	43
	Gegužė	13.3	12.9	28.6	56
	Birželis	21.1	16.3	27.5	65
	Liepa	17.1	18.5	49.9	92
	Rugpjūtis	18	17.6	100.3	76
	Rugsėjis	12.6	12.6	46.6	57
	Spalis	9	6.8	52.5	60
2020	Kovas	3.2	0.7	38.4	41
	Balandis	6.6	7.4	6.2	43
	Gegužė	10.3	12.9	77.8	56
	Birželis	19.4	16.3	68.4	65
	Liepa	17.6	18.5	66.8	92
	Rugpjūtis	18.4	17.6	77.5	76
	Rugsėjis	14.6	12.6	14.4	57
	Spalis	10.1	6.8	46.9	60
http://www.meteo.lt/documents/20181/103901/standartine-klimato-norma-1991-2020.pdf
